# Supplementary material for: Strain -multiplexing optical-tuning based on single-pulsed holographic nanostructures
Source: Royal Society of Chemistry journal article supplement (doi:10.1039/d1nr01586a), 2021-01-01
Supplement: d1nr01586a1.pdf [file d1nr01586a1.pdf]

## SUPPORTING INFORMATION

# Strain-Multiplexing Optical-Tuning based on Single-Pulsed Holographic Nanostructures

<sup>\*,1</sup>Muhammad Waqas Khalid, <sup>\*,1,2</sup>Rajib Ahmed and <sup>3</sup>Haider Butt

School of Engineering, University of Birmingham, Birmingham, CA 94305, UK

Stanford School of Medicine, Palo Alto, CA 94304, United States of

Department of Mechanical Engineering, Khalifa University, Abu Dhabi, P.O. 127788, UAE

**Email:** rajibah@stanford.edu (R.A.), haider.butt@ku.ac.ae (H. B.)

\* These authors contributed equally

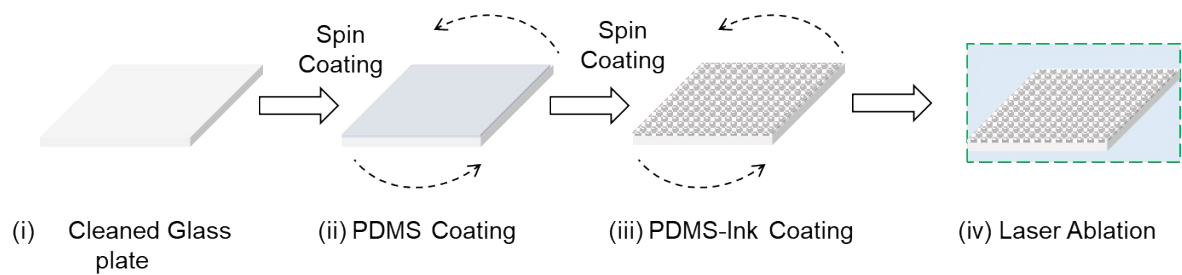

**Figure S1.** (i-iv) PDMS-Ink HMM surface preparation and laser ablation.

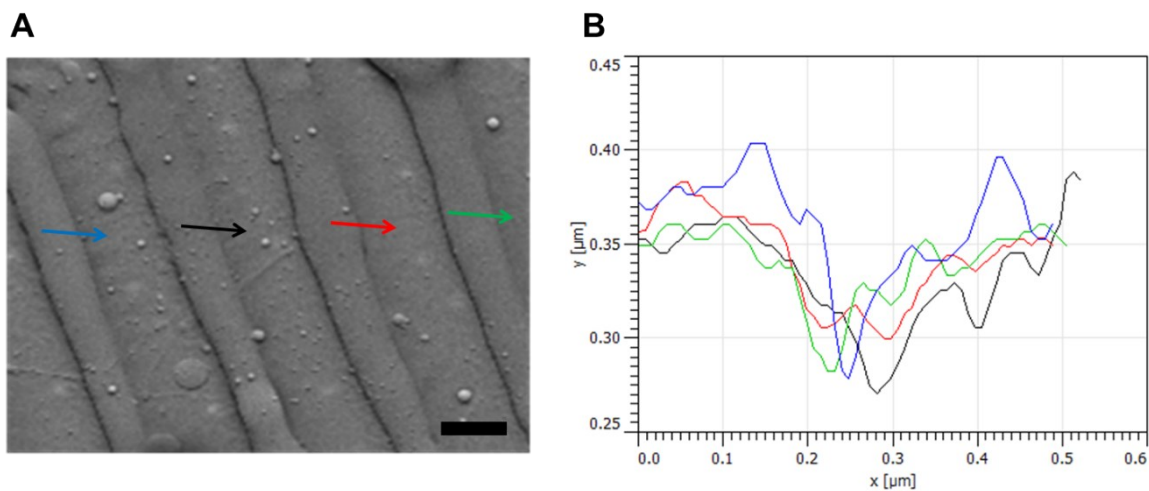

**Figure S2.** A, B SEM image of PDMS-Ink HMM sample and grating height variations. Scale = 400 nm.

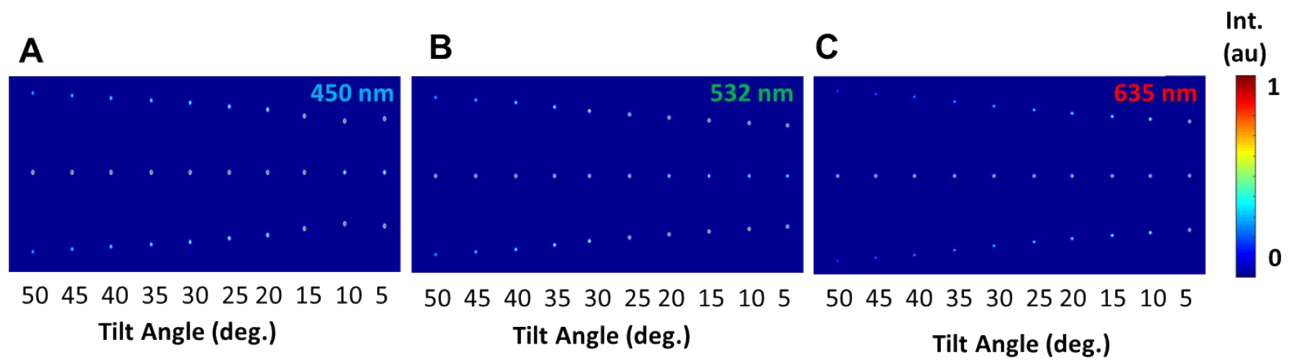

**Figure S3.** A-C Computational modelling of diffraction distance variation with laser interference tilt angle (deg.) variations.

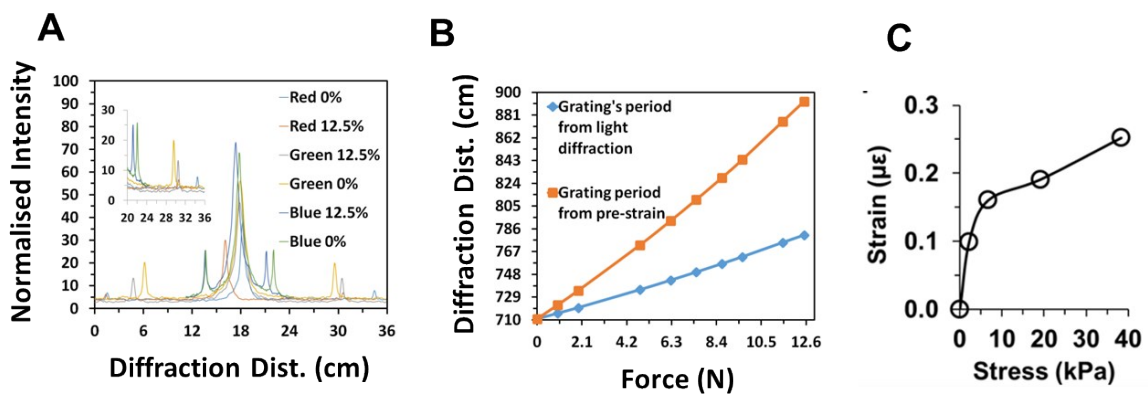

**Figure S4.** **A** Diffraction intensity as a function of diffraction distance. **B** Diffraction distance with applied strain. **C** Strain as a function of stress.

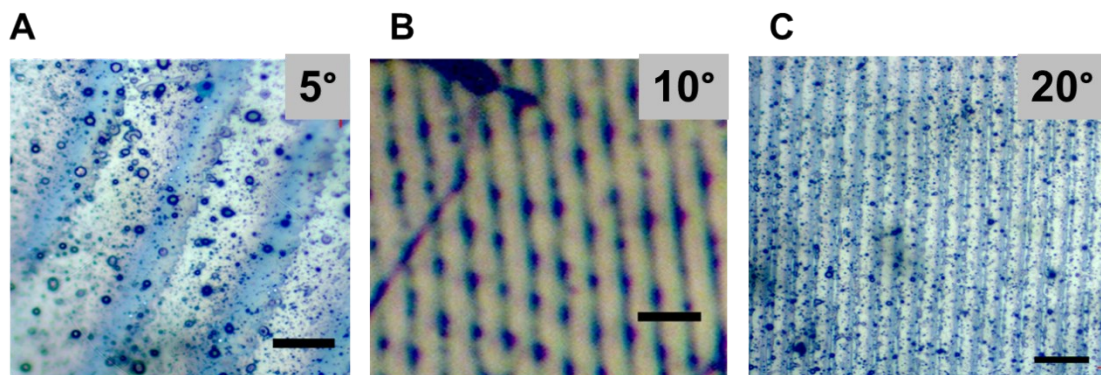

**Figure S5.** Optical microscopic image of Ink grating sample. Scales = 5  $\mu\text{m}$ .

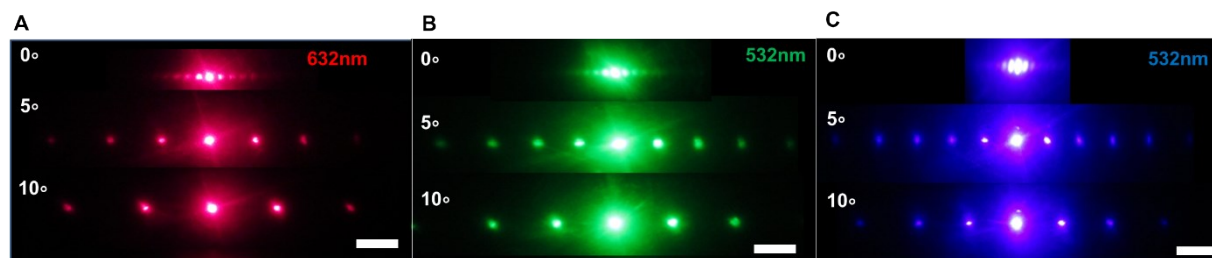

**Figure S6.** A-C Diffraction distances variation with tilted angle variations (0-10°). Scales = 2.5 cm.

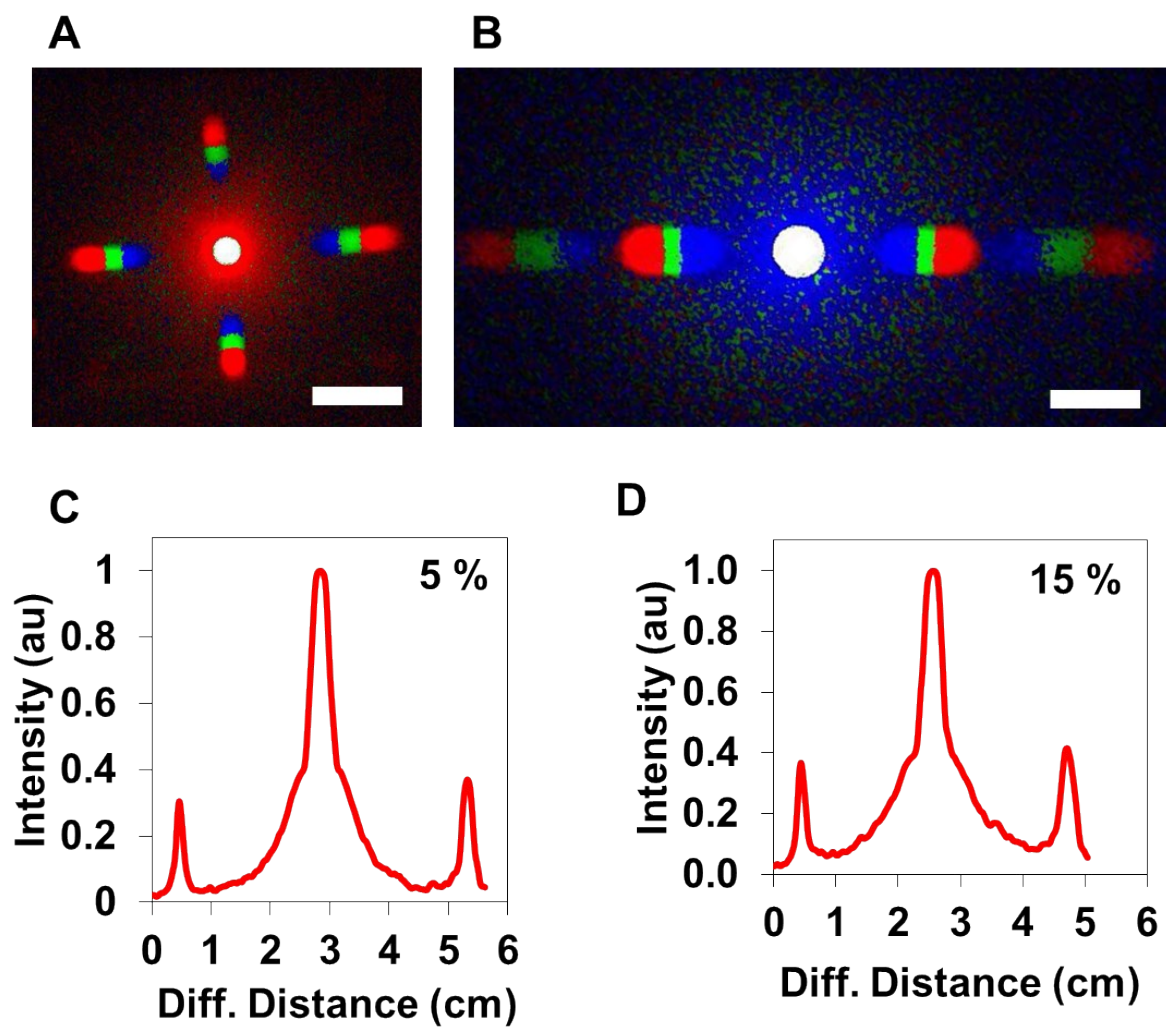

**Figure S7.** (A, B) Broadband light diffraction of HMM square and parallel grating surface. (C, D) Diffraction intensity profile with applied strain (5 %, 15%). Scales = 2.5 and 1.0 cm.



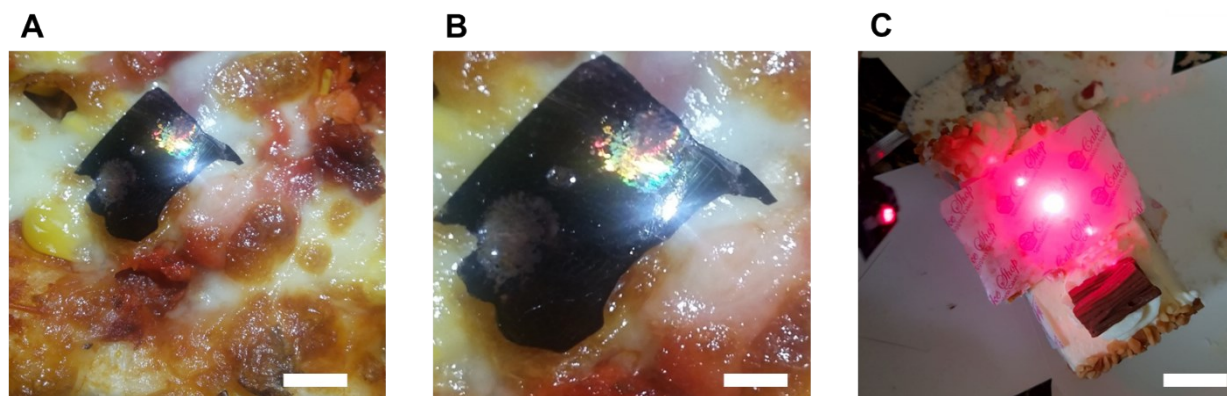

**Figure S8.** A-C Gelatin-ink grating for food decoration and light diffraction property. Scales = 5 cm.

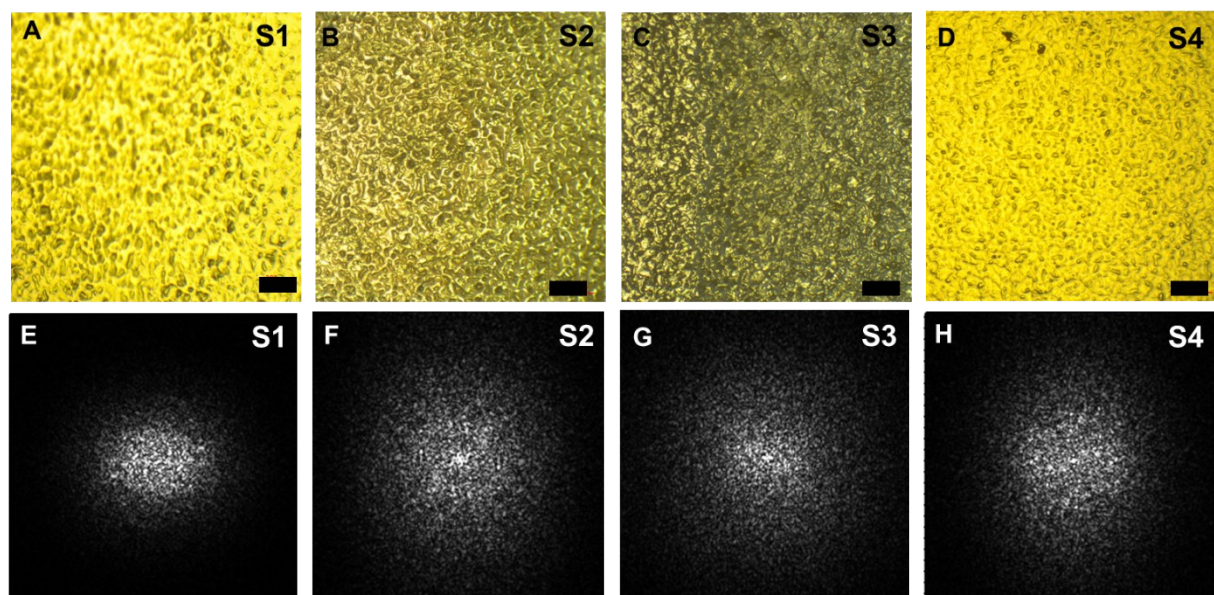

**Figure S9.** A-B Optical microscopic image and FFT of HMM diffuser (PDMS-Gold) S1-S3 with laser ablation energy (90 to 320 mJ/cm<sup>2</sup>). Scales = 200  $\mu$ m.

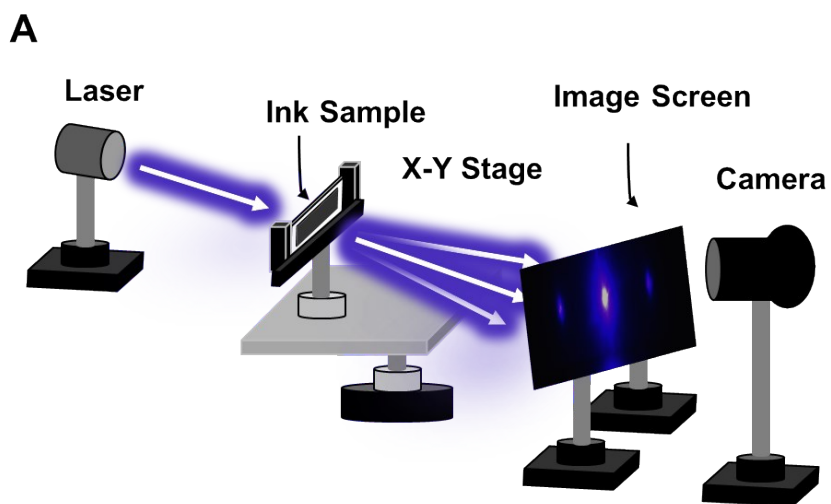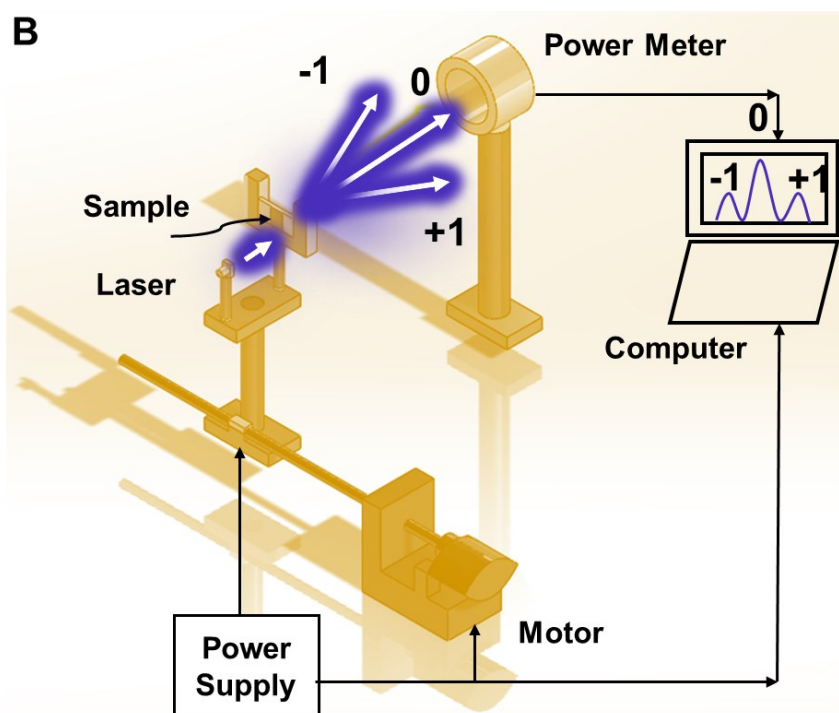

**Figure S10.** **A** Far-field light-scattering captured through an image-screen setup. **B** Light-scattering measurement through an angular setup.
